# Supplementary material
Source: PubMed Central journal article supplement (PMC7079959)
Supplement: 253_2015_6664_MOESM1_ESM.pdf [file 253_2015_6664_MOESM1_ESM.pdf]

## Supplementary Material

A novel method to produce armored double-stranded DNA by encapsulation of MS2 viral capsids

Applied Microbiology and Biotechnology

Lei Zhang,<sup>1,2</sup> Yu Sun,<sup>2</sup> Le Chang,<sup>2,3</sup> Tingting Jia,<sup>2,3</sup> Guojing Wang,<sup>2,3</sup> Rui Zhang,<sup>2</sup> Kuo Zhang,<sup>2</sup> and Jinming Li<sup>1,2, #</sup>

Peking University Fifth School of Clinical Medicine, Beijing, P. R. China<sup>1</sup>;

National Center for Clinical Laboratories, Beijing Hospital, Beijing, P.R. China<sup>2</sup>;

Graduate School, Peking Union Medical College, Chinese Academy of Medical Sciences, Beijing, P. R. China<sup>3</sup>

Running title: Armored double-stranded DNA produced by MS2 bacteriophage

# Corresponding author

E-mail: jmli@nccl.org.cn

Mailing address: National Center for Clinical Laboratories, Beijing Hospital, No.1

Dahua Road, Dongdan, Beijing 100730, P.R. China.

Tel.: +86 10 58115061; Fax: +86 10 65212064.

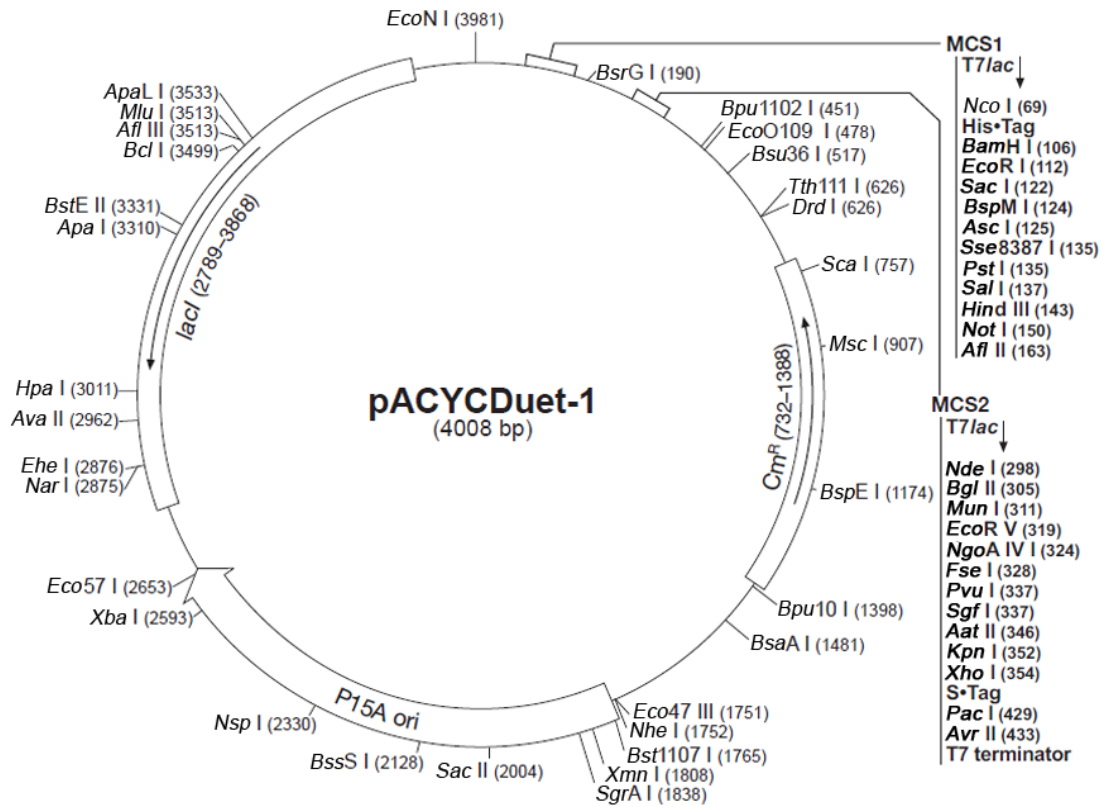

**Fig. S1** The map of the plasmid pACYCDuet-1. The sequences of bacteriophage MS2 CP and maturase genes (81–1749 nt) were inserted into the MCS1 of the vector between *Bam*HI and *Hind*III, generating the recombinant plasmid for the expression of MS2 VLPs.

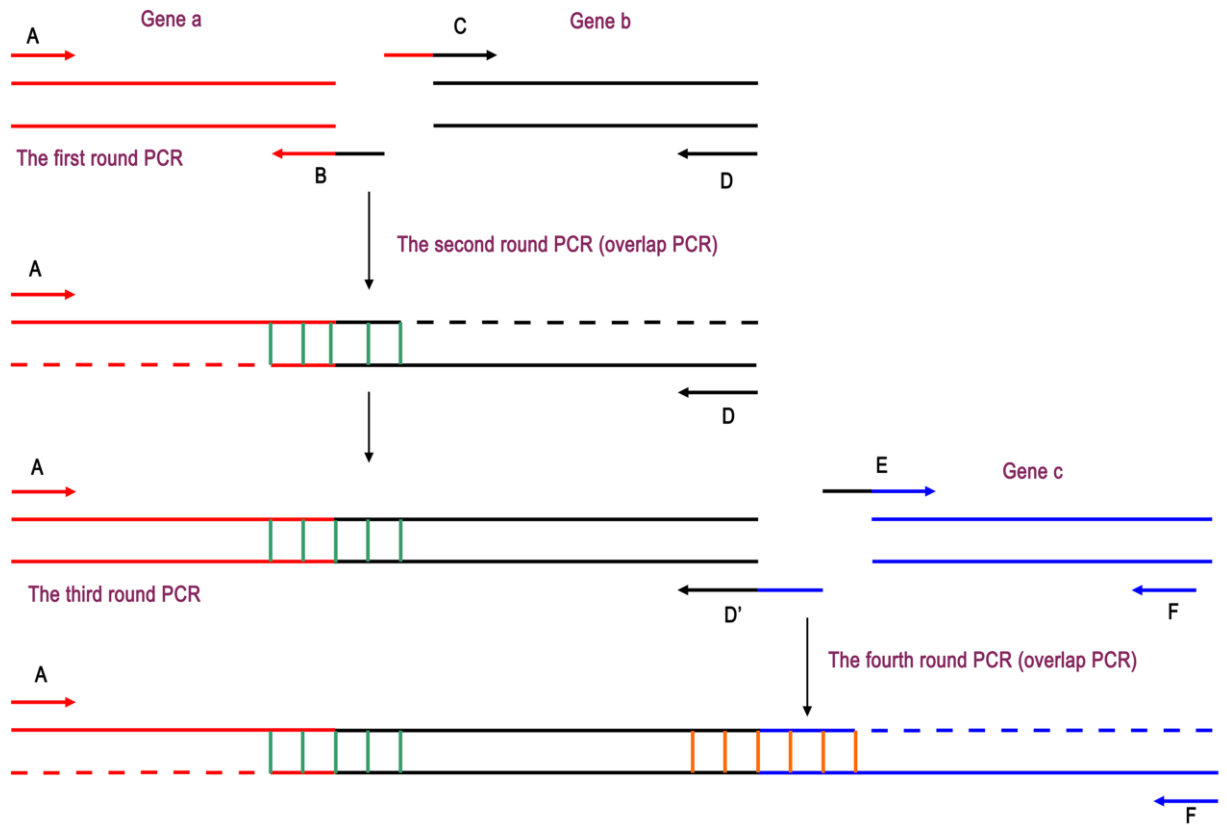

**Fig. S2** Schematic diagrams for DNA fragments construction by overlapping extension PCR. In the first-round PCR, gene a and gene b represent C (nt 1211–2440, 630 bp) and S (nt 121–840,720 bp) regions of HBV DNA, the E6 (nt 26–820,795 bp) and L1 (nt 6151–7069, 919 bp) regions of HPV-16 DNA, the E6 (nt 101–1342, 1283 bp) and L1 (nt 6265–71246, 860 bp) regions of HPV-18 DNA. In the second round PCR for extension, primer sets HBV-SF and HBV-CR, HPV 16-E<sub>6</sub>F and HPV 16-LR, and HPV 18-E<sub>6</sub>F and HPV 18-LR were used to obtain overlapping fragments of 1.3 kb, 1.7 kb and 2.1 kb, respectively. Gene c representing the E1 region (nt 1103–2807, 1705 bp) of HPV-16 or E1 region (nt 2047–2987, 941 bp) of HPV-18 was amplified in the third round PCR, as well as the 1.7 kb and 2.1 kb DNA using primers HPV 16-E<sub>6</sub>F and HPV 16-L<sub>1</sub>R, and HPV 18-E<sub>6</sub>F and HPV 16-L<sub>1</sub>R. In the fourth round PCR for extension, primers HPV 16-E<sub>6</sub>F and HPV 16-E<sub>1</sub>R, and HPV 18-E<sub>6</sub>F and HPV 18-E<sub>1</sub>R were used to amplify the overlapping fragments of 3.5 kb for HPV-16 and 3 kb for HPV-18. Finally, a 6.5-kb fragment containing HPV-16 DNA of 3.5 kb and HPV-18 DNA of 3 kb were obtained using the same method.

**TABLE S1 Primers used in the overlapping extension PCR**

| <b>Primer</b>             | <b>Sequence(5'-3')</b>                           |
|---------------------------|--------------------------------------------------|
| HBV-SF                    | AATCTTCTCGAGGACTGGGGA                            |
| HBV-SR                    | AGGGGAAAAAGTTGCATGGTAGGGTTCAAATGTATACCCAAAGAC    |
| HBV-CF                    | GTCTTTGGGTATACATTTGAACCCTACCATGCAACTTTTTCCCCT    |
| HBV-CR                    | TTCCC GAGAT TGAGA TCTTC T                        |
| HPV 16-E <sub>6</sub> F   | AAGGGCGTAACCGAAATCG                              |
| HPV 16-E <sub>6</sub> R   | AAAAAAATAGGGAAAACGTTTACGGTGTGCCCATTAACAGGTCTT    |
| HPV 16-L <sub>1</sub> F   | AAGACCTGTTAATGGGCACAC GATGTCTCTTTGGCTGCCTA       |
| HPV 16-LR                 | GTTTGGCCTTCAATCCTGCT                             |
| HPV 16-L <sub>1</sub> R   | CGTTTTAGAACCTGTACTGCATCTCGTTTGGCCTTCAATCCTGCT    |
| HPV 16-E <sub>1</sub> F   | AGCAGGATTGAAGGCCAAACGAGATGCAGTACAGGTTCTAAAACG    |
| HPV 16-E <sub>1</sub> R   | TGTGTTAGTATTTTGTCTGACACA                         |
| HPV 18-E <sub>6</sub> F   | TACTATGGCGCGCTTTGA                               |
| HPV 18-E <sub>6</sub> R   | TGACAAATATCCAATGGTACCTCACTTCCACTTCAGAACAGCCATAGC |
| HPV 18-L <sub>1</sub> F   | GCTATGGCTGTTCTGAAGTGGAAGTGAGGTACCATTGGATATTTGTCA |
| HPV 18-LR                 | ACGTACACGCACACGCTTG                              |
| HPV 18-L <sub>1</sub> R   | TCAAATGCCATATCGCTTTCAACGTACACGCACACGCTTG         |
| HPV 18-E <sub>1</sub> F   | CAAGCGTGTGCGTGTACGTTGAAAGCGATATGGCATTGGA         |
| HPV 18-E <sub>1</sub> R   | TGTCTGTATGCCATGTTCCCT                            |
| 168 over-E <sub>6</sub> F | AGGGAACATGGCATAACAGACAAAGGGCGTAACCGAAATCG        |
| 168 over-E <sub>1</sub> R | CGATTTCCGGTTACGCCCTTTGTCTGTATGCCATGTTCCCT        |
